# Supplementary material for: Determining a Welfare Prioritization for Horses Using a Delphi Method
Source: PubMed Central journal article supplement (PMC7222753; doi:10.3390/ani10040647), 2020-04-09
Supplement: animals-10-00647-s001.pdf [file animals-10-00647-s001.pdf]

**Table 1.** Percentage agreement with the ranking of horse issues from first online survey scored by experts in the second online survey. Arrows indicate whether, overall, experts considered that the issue should be moved up or down the list. Box colours indicate average agreement of 75% or higher in green, between 50% and 75% in orange, and less than 50% in red. (NB to reduce the workload of experts in the 2<sup>nd</sup> survey a small number of similar issues from the first survey were combined, hence numbers of issues are slightly fewer than in Table 2 in the Manuscript).

| <b>Rank order</b> | <b>Prevalence</b>                                                                    | <b>% Ranking agreement</b> | <b>Severity</b>                                                                             | <b>% Ranking agreement</b> | <b>Duration</b>                                                                             | <b>% Ranking agreement</b> |
|-------------------|--------------------------------------------------------------------------------------|----------------------------|---------------------------------------------------------------------------------------------|----------------------------|---------------------------------------------------------------------------------------------|----------------------------|
| 1                 | Lack of recognition of pain behaviour (e.g. can be misinterpreted as bolshy/naughty) | 64%                        | Hunger                                                                                      | 36% ↓                      | Obesity (e.g. due to lack of work, unrestricted grazing etc)                                | 50%                        |
| 2                 | Obesity (e.g. due to lack of work, unrestricted grazing etc)                         | 36% ↓                      | Lack of access to clean/fresh water                                                         | 57%                        | Lack of recognition of pain behaviour (e.g. can be misinterpreted as bolshy/naughty)        | 64%                        |
| 3                 | Lack of understanding of horse welfare needs by owner/carer                          | 39% ↑                      | Obesity (e.g. due to lack of work, overgrazing etc)                                         | 36% ↓                      | Hunger                                                                                      | 36% ↓                      |
| 4                 | Over-rugging (horse lacks control if too hot/cold)                                   | 43% ↑                      | Lack of recognition of pain behaviour (e.g. can be misinterpreted as boshly/naughty)        | 29% ↑                      | Inability to perform normal social interactions (including social isolation, stabling 24/7) | 71%                        |
| 5                 | Use of inappropriate training and handling methods                                   | 43% ↑                      | Delayed euthanasia                                                                          | 36% ↑                      | Lack of biosecurity and disease surveillance                                                | 57%                        |
| 6                 | Delayed euthanasia decisions                                                         | 36% ↑                      | Lack of biosecurity and disease surveillance                                                | 57%                        | Delayed euthanasia                                                                          | 43% ↔                      |
| 7                 | Poorly fitting and restrictive tack                                                  | 79%                        | Long distance transport                                                                     | 46% ↓                      | Lack of routine health care (e.g. vaccinations, dental, parasite prevention)                | 79%                        |
| 8                 | Poor owner knowledge of horse care                                                   | 43% ↑                      | Inability to perform normal social interactions (including social isolation, stabling 24/7) | 43% ↑                      | Large worm burdens                                                                          | 64%                        |
| 9                 | Unstable social groups                                                               | 57%                        | Overworking                                                                                 | 57%                        | Poor owner knowledge of horse care                                                          | 57%                        |
| 10                | Lack of biosecurity and disease surveillance                                         | 50%                        | Poorly fitting and restrictive tack                                                         | 79%                        | Poor pasture management                                                                     | 50%                        |

|    |                                                                                                         |       |                                                                                                         |       |                                                                                                         |       |
|----|---------------------------------------------------------------------------------------------------------|-------|---------------------------------------------------------------------------------------------------------|-------|---------------------------------------------------------------------------------------------------------|-------|
| 11 | Inability to perform normal social interactions (e.g. social isolation, stabling 24/7)                  | 57%   | Abandonment or stray horses                                                                             | 86%   | Over-rugging (horse lacks control if too hot/cold)                                                      | 43% ↓ |
| 12 | No regulation of establishments or service providers                                                    | 54%   | Unsuitable diets for equine feeding behaviour (e.g. feeding methods of stabled horses, turned out 24/7) | 50%   | Unsuitable diets for equine feeding behaviour (e.g. feeding methods of stabled horses, turned out 24/7) | 57%   |
| 13 | Unsuitable diets for equine feeding behaviour (e.g. feeding methods of stabled horses, turned out 24/7) | 57%   | Overweight riders for horse                                                                             | 64%   | Use of food supplements                                                                                 | 29% ↓ |
| 14 | Negative affective states (fear, frustration, boredom, depression, anxiety)                             | 57%   | Use of inappropriate training and handling methods                                                      | 43% ↑ | No regulation of establishments or service providers                                                    | 46% ↓ |
| 15 | Poor pasture management                                                                                 | 57%   | Unavoidable aggressive social interactions (e.g. restricted resources in groups, etc)                   | 57%   | Negative affective states (fear, frustration, boredom, depression, anxiety)                             | 36% ↑ |
| 16 | Neglect                                                                                                 | 86%   | Neglect                                                                                                 | 57%   | Lack of understanding of horse welfare needs                                                            | 36% ↑ |
| 17 | Horse passports not fit for purpose                                                                     | 54%   | Large worm burdens                                                                                      | 64%   | Overweight riders for horse                                                                             | 71%   |
| 18 | Overworking                                                                                             | 36% ↓ | Hiring horses to unsuitable riders                                                                      | 86%   | Poorly fitting and restrictive tack                                                                     | 64%   |
| 19 | Poor health knowledge by owner                                                                          | 64%   | Poor weaning methods                                                                                    | 50%   | Use of inappropriate training and handling methods                                                      | 50%   |
| 20 | Poor weaning methods                                                                                    | 64%   | Poor health knowledge by owner                                                                          | 71%   | Neglect                                                                                                 | 64%   |
| 21 | Overweight riders for horse                                                                             | 64%   | No regulation of establishments or service providers                                                    | 54%   | Poor weaning methods                                                                                    | 46% ↑ |
| 22 | Use of food supplements                                                                                 | 36% ↓ | Over-rugging (horse lacks control if too hot/cold)                                                      | 50%   | Indiscriminate breeding (including of compromised animals)                                              | 71%   |
| 23 | Indiscriminate breeding (including of compromised animals)                                              | 64%   | Poor owner knowledge of horse care                                                                      | 62%   | Unstable social groups                                                                                  | 64%   |
| 24 | Being ridden                                                                                            | 21% ↓ | Horse passports not fit for purpose                                                                     | 46% ↓ | Abandonment or stray horses                                                                             | 79%   |
| 25 | Fear, stress or injury from use in work sport or entertainment                                          | 43% ↔ | Negative affective states (fear, frustration, boredom, depression, anxiety)                             | 43% ↑ | Poor owner health knowledge                                                                             | 69%   |
| 26 | Lack of routine health care (e.g. vaccinations, dental, parasite prevention)                            | 71%   | Unstable social groups                                                                                  | 29% ↑ | Lack of access to clean/fresh water                                                                     | 57%   |
| 27 | Hiring horses to unsuitable riders                                                                      | 79%   | Poor pasture management                                                                                 | 64%   | Hiring horses to unsuitable riders                                                                      | 71%   |

|    |                                                                                       |     |                                                                              |       |                                                                                       |     |
|----|---------------------------------------------------------------------------------------|-----|------------------------------------------------------------------------------|-------|---------------------------------------------------------------------------------------|-----|
| 28 | Poor transport of horses on domestic journeys                                         | 64% | Lack of understanding of horse welfare needs                                 | 21% ↑ | Unavoidable aggressive social interactions (e.g. restricted resources in groups, etc) | 79% |
| 29 | Long distance transport                                                               | 71% | Fear, stress or injury from use in work sport or entertainment               | 43% ↑ | Long distance transport                                                               | 71% |
| 30 | Unavoidable aggressive social interactions (e.g. restricted resources in groups, etc) | 71% | Indiscriminate breeding (including of compromised animals)                   | 43% ↑ | Fear, stress or injury from use in work sport or entertainment                        | 57% |
| 31 |                                                                                       |     | Lack of routine health care (e.g. vaccinations, dental, parasite prevention) | 57%   | Flygrazing                                                                            | 86% |
| 32 |                                                                                       |     | Poor transport of horses on domestic journeys                                | 93%   | Overworking                                                                           | 86% |
| 33 |                                                                                       |     | Lack of easy access to health care                                           | 79%   | Lack of easy access to health care                                                    | 79% |
